# Supplementary material for: Asthma, COPD and SARS-CoV-2 infection (COVID-19): potential mechanistic insights
Source: PubMed Central journal article supplement — Eur Respir J. 2021 Aug 26;58(2):2100920. doi: 10.1183/13993003.00920-2021 (PMC8287734; doi:10.1183/13993003.00920-2021), 2021-08-26

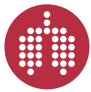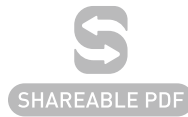

# Asthma, COPD and SARS-CoV-2 infection (COVID-19): potential mechanistic insights

Peter A.B. Wark <sup>1,2</sup>, Prabuddha S. Pathinayake <sup>1</sup>, Mathew Suji Eapen <sup>3</sup> and Sukhwinder Singh Sohal<sup>3</sup>

<sup>1</sup>Priority Research Centre for Healthy Lungs, Hunter Medical Research Institute and School of Medicine and Public Health, University of Newcastle, Newcastle, Australia. <sup>2</sup>Dept of Respiratory and Sleep Medicine, John Hunter Hospital, Newcastle, Australia. <sup>3</sup>Respiratory Translational Research Group, Dept of Laboratory Medicine, School of Health Sciences, College of Health and Medicine, University of Tasmania, Launceston, Australia.

Sukhwinder Singh Sohal ([sssohal@utas.edu.au](mailto:sssohal@utas.edu.au))

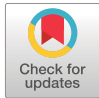

Shareable abstract (@ERSpublications)

Patients with asthma are somewhat protected from COVID-19 complications compared to COPD. This may be due to variability in viral attachment protein, ICS use, smoking/vaping status, a skewed inflammatory pattern, and dysregulated endocytic machinery. <https://bit.ly/3qOcyNb>

**Cite this article as:** Wark PAB, Pathinayake PS, Eapen MS, *et al.* Asthma, COPD and SARS-CoV-2 infection (COVID-19): potential mechanistic insights. *Eur Respir J* 2021; 58: 2100920 [DOI: 10.1183/13993003.00920-2021].

This single-page version can be shared freely online.

Copyright ©The authors 2021

This version is distributed under the terms of the Creative Commons Attribution Non-Commercial Licence 4.0. For commercial reproduction rights and permissions contact [permissions@ersnet.org](mailto:permissions@ersnet.org)

Received: 29 March 2021  
Accepted: 24 June 2021

*To the Editor:*

We read with interest the manuscripts [1, 2] and the accompanying editorial [3] describing the risk of severe disease and infection with severe acute respiratory syndrome coronavirus 2 (SARS-CoV-2) and asthma, but are struck by the difference seen with risk of complications from asthma and coronavirus disease 2019 (COVID-19) compared to the experience during the 2009 influenza pandemic, where people with asthma were clearly at heightened risk, at least of hospitalisation [4]. In contrast, those who smoke or have COPD, appear at greater risk. Observational studies will never be able to provide evidence of cause and effect and a greater understanding of the mechanisms of susceptibility to infection with SARS-CoV-2 is also required. Hence, we would like to take this further and enhance discussion on potential mechanisms (figure 1).

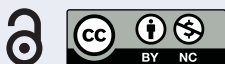

Supplement: ERJ-00920-2021.Shareable.pdf [file ERJ-00920-2021.Shareable.pdf]
